# Supplementary material for: Metabolic regulation of T cell development by Sin1–mTORC2 is mediated by pyruvate kinase M2
Source: PubMed Central journal article supplement (PMC6392101; doi:10.1093/jmcb/mjy065), 2018-11-14
Supplement: mjy065_supplementary_material.pdf [file mjy065_supplementary_material.pdf]

# Supplementary Material

## **Metabolic regulation of T cell development by Sin1-mTORC2 is mediated by pyruvate kinase M2**

Xinxing Ouyang<sup>1</sup>, Yuheng Han<sup>1</sup>, Guojun Qu<sup>1</sup>, Man Li<sup>1</sup>, Omotooke Arojo<sup>2</sup>,  
Hongxiang Sun<sup>1</sup>, Xiaobo Liu<sup>1</sup>, Dou Liu<sup>2</sup>, Lei Chen<sup>1</sup>, Qiang Zou<sup>1,\*</sup>, and Bing Su<sup>1,2,\*</sup>

<sup>1</sup>Shanghai Institute of Immunology, Department of Immunology and Microbiology,  
Key Laboratory of Cell Differentiation and Apoptosis of Chinese Ministry of  
Education, Shanghai Jiao Tong University School of Medicine, Shanghai 200025,  
China

<sup>2</sup>Department of Immunobiology and the Vascular Biology and Therapeutics Program,  
Yale University School of Medicine, 333 Cedar Street, New Haven, Connecticut  
06520, USA

\*Correspondence should be addressed to: Qiang Zou (qzou1984@sjtu.edu.cn) or Bing  
Su (bingsu@sjtu.edu.cn).

## Contents

|                                                                                                                                               |    |
|-----------------------------------------------------------------------------------------------------------------------------------------------|----|
| I. Supplementary Figures.....                                                                                                                 | 3  |
| Supplementary Figure S1. Generation of conditional knockout mice with targeted mutation of <i>Sin1</i> .....                                  | 3  |
| Supplementary Figure S2. Mice reconstituted by Sin1 KO BM show defects in thymocyte development.....                                          | 5  |
| Supplementary Figure S3. T cell developmental defects caused by Sin1 deletion are cell intrinsic .....                                        | 7  |
| Supplementary Figure S4. Deletion Sin1 in T cells from LckCre/ <i>Sin1<sup>fl/fl</sup></i> and Cd4Cre/ <i>Sin1<sup>fl/fl</sup></i> mice. .... | 8  |
| Supplementary Figure S5. Sin1 deficiency does not affect CD127 and TCR expression in thymocytes .....                                         | 9  |
| Supplementary Figure S6. Gene sets upregulated in DN thymocytes of Sin1 deficient mice by GSEA analysis .....                                 | 10 |
| Supplementary Figure S7. Sin1 deficiency does not alter the downstream of MAPK signal pathways .....                                          | 11 |
| Supplementary Figure S8. AKT controls PKM2 expression in MEF cells.....                                                                       | 12 |
| Supplementary Figure S9. proposed model illustrating the Sin1-mediated regulation of early thymocyte proliferation and development.....       | 13 |
| II. Supplementary tables.....                                                                                                                 | 14 |
| Supplementary Table S1. Primers used for genotyping. ....                                                                                     | 14 |
| Supplementary Table S2. Primers used for Real time-PCR.....                                                                                   | 14 |
| Supplementary Table S3. Transcriptions significantly more abundant in Sin1 deficient DN thymocytes.....                                       | 14 |
| Supplementary Table S4. Transcriptions significantly less abundant in Sin1 deficient DN thymocytes.....                                       | 15 |

## I. Supplementary Figures

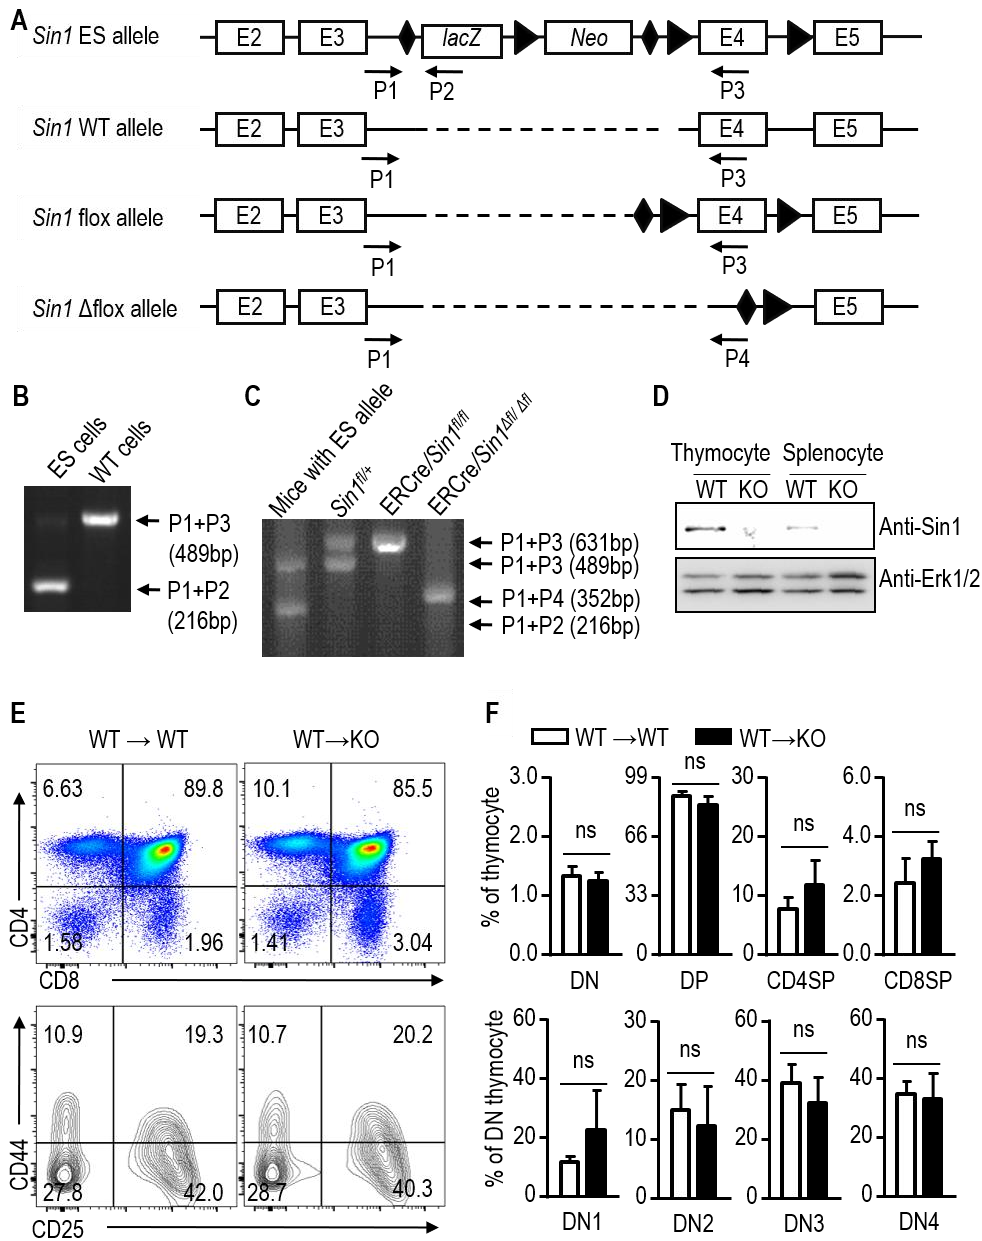

### Supplementary Figure S1. Generation of conditional knockout mice with targeted mutation of *Sin1*

(A) A diagram shown the targeted *Sin1* allele in ES cells (*Sin1* ES allele), *Sin1* WT allele, *Sin1* flox allele, and *Sin1* Δflox allele as indicated. E2, E3, E4 and E5 indicate the exon 2, exon 3, exon 4 and exon 5 of *Sin1* gene, respectively. The black diamonds and black triangles indicate the Frt and loxP sites, respectively.

P1(5'-TGTATTAGCCTGCACAAGGAGT-3'),

P2(5'-CAACGGGTTCTTCTGTAGTCC-3'),

P3(5'-ATGGACTGCTTGCCTGAACT-3') and P4(5'-ATTGAACTGATGGCGAGCTC-3') are primers used for PCR reactions to distinguish the four types of Sin1 alleles, and their relative locations are also shown in the diagram. (B) PCR analysis of genomic DNA isolated from Sin1 ES cells and WT cells. (C) PCR analysis of genomic DNA isolated from mouse toes. (D) Immune blot assay for Sin1 expression in thymocytes and splenocytes. Thymocytes and splenocytes were freshly isolated from tamoxifen-treated *Sin1<sup>fl/fl</sup>* mice and *ERCre/Sin1<sup>fl/fl</sup>* mice. Whole cell extracts were prepared for immunoblotting of Sin1 expression, and the Erk1/2 expression is served as a loading control. (E) Surface staining of total thymocytes from lethally irradiated *Sin1<sup>fl/fl</sup>* mice (WT) or *ERCre/Sin1<sup>fl/fl</sup>* mice (KO) which were reconstituted with bone-marrow cells from wild type (WT) C57BL/6 CD45.1 mice (CD45.1<sup>+</sup>) with indicated antibodies. Upper panels are CD4 and CD8 staining. Lower panels are gated on the CD4 and CD8 double negative (DN) subset for further CD44 and CD25 expression analyses. Numbers in in the panels show the relative percentage of cells in that area. (F) Quantification of thymocyte subsets determined by FACS as described above in panel E (n=3). Error bars shows mean  $\pm$  SD. Significance was determined by two-tailed Student's t test (\*,  $p < 0.05$ ; ns, no significant).

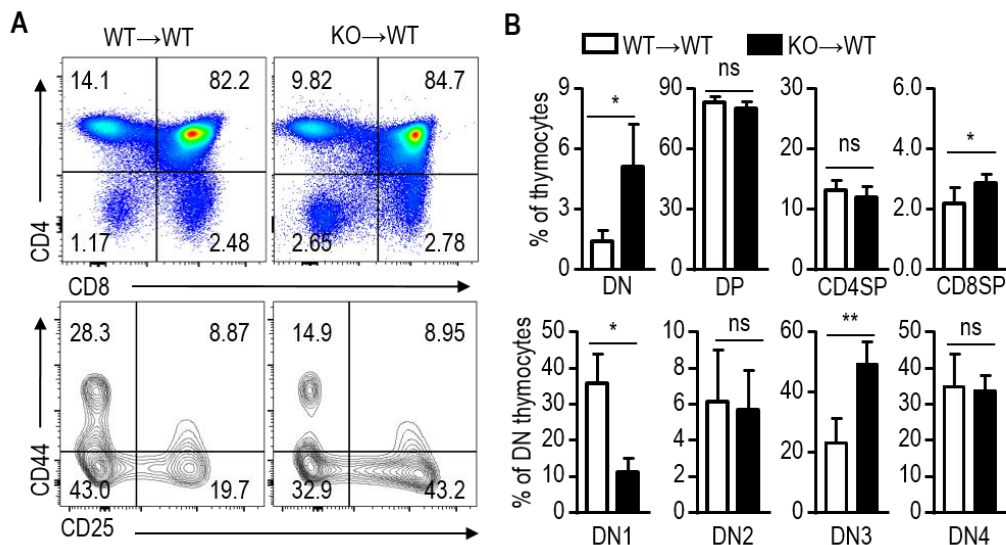

**Supplementary Figure S2. Mice reconstituted by *Sin1* KO BM show defects in thymocyte development**

(A) Surface staining of total thymocytes from irradiated C57BL/6 CD45.1 mice (CD45.1<sup>+</sup>) that were reconstituted by bone marrow cells isolated from tamoxifen-treated *Sin1*<sup>fl/fl</sup> mice or *ERCre/Sin1*<sup>fl/fl</sup> mice (CD45.2<sup>+</sup>). The upper panels show CD4 and CD8 staining, whereas the lower panels show CD44 and CD25 staining of the gated CD4 and CD8 double negative (DN) subsets from the upper panels. Numbers in the panels indicate the percentages of cells in that specific area. (B) Quantification of thymocyte subsets determined by FACS analyses, as described above in (A) (n=4). Error bars shows mean ± SD. Significance was determined by two-tailed Student's *t* test (\*, *p* < 0.05; \*\*, *p* < 0.01; ns, no significant difference).

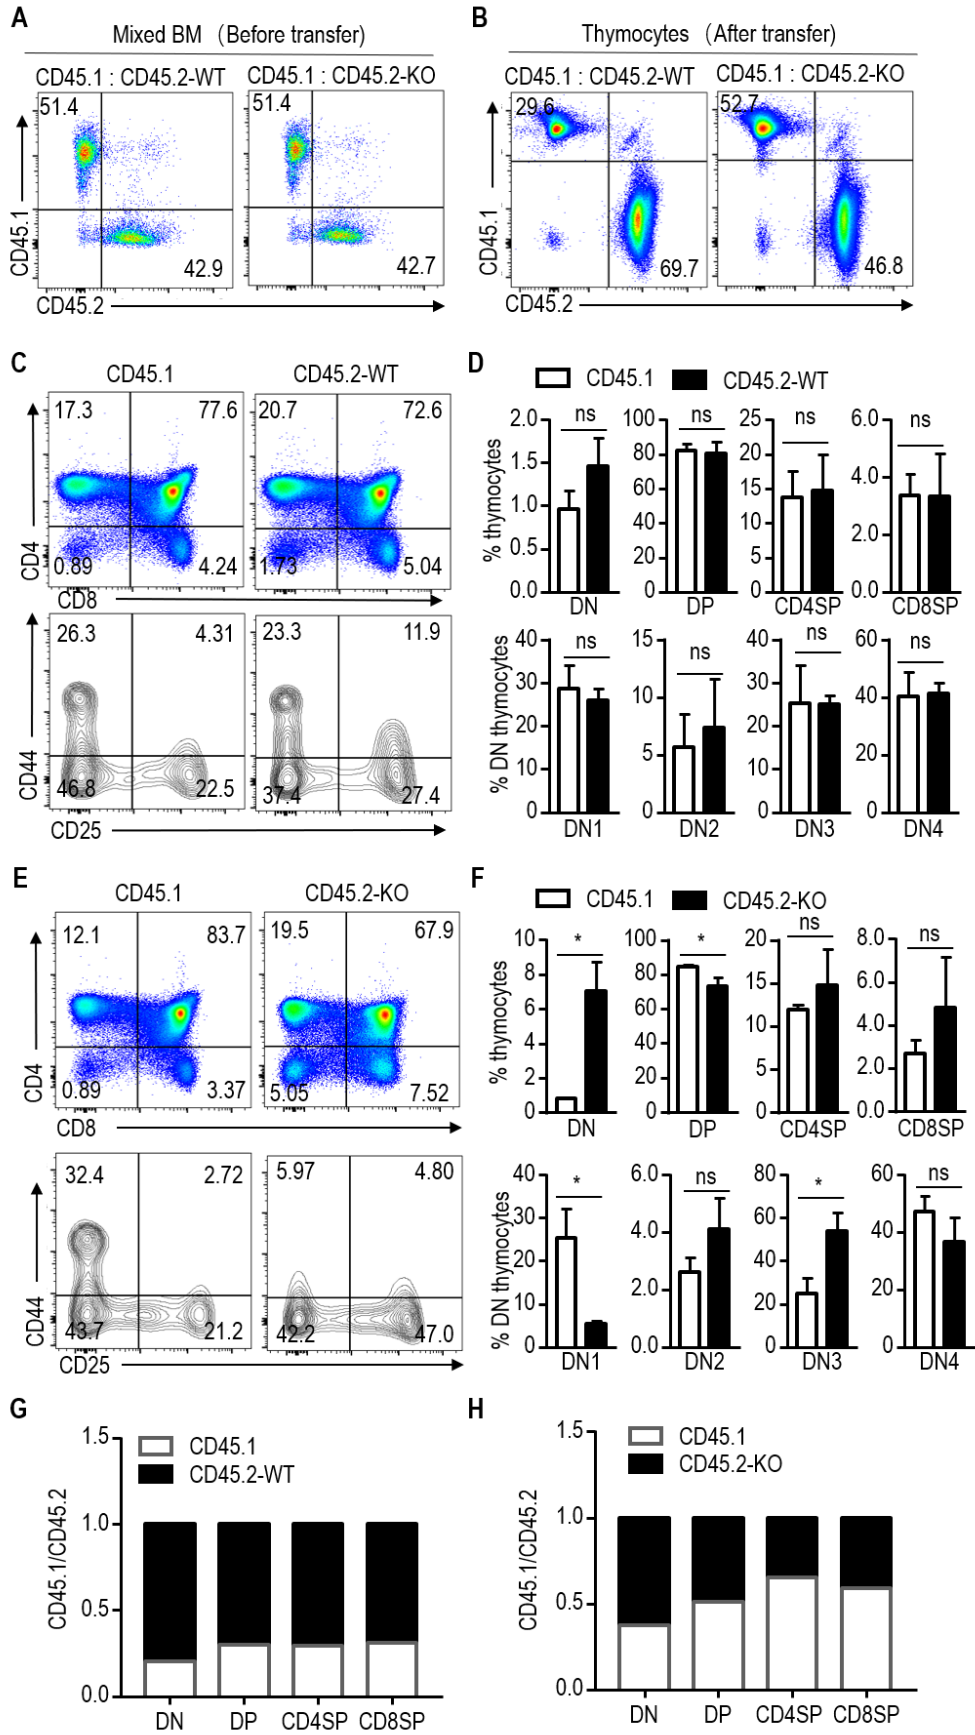

**Supplementary Figure S3. T cell developmental defects caused by Sin1 deletion are cell intrinsic**

(A) FACS results shows Mixed BM before transfer and reconstituted thymocyte population. Bone marrow cells were isolated from C57BL/6 CD45.1 (CD45.1<sup>+</sup>) and WT(CD45.2<sup>+</sup>) or Sin1 KO(CD45.2<sup>+</sup>) mice and mixed at roughly 1:1 ratio. (B) Surface staining of thymocytes from BM reconstituted mice. Thymocytes were shown based on the expression of CD45.1 and CD45.2. (C) Surface staining of thymocytes from the lethally irradiated CD45.1<sup>+</sup>CD45.2<sup>+</sup> mice, which were reconstituted by mixed WT (CD45.2<sup>+</sup>) and C57BL/6 CD45.1 mice (CD45.1<sup>+</sup>) and analysed as described above. (D) Quantification of CD45.1<sup>+</sup> thymocytes or CD45.2<sup>+</sup> thymocytes as described above in (C) (n=3). (E) Surface staining of thymocytes from irradiated CD45.1<sup>+</sup>CD45.2<sup>+</sup> mice, which were reconstituted by mixed Sin1 KO BM cells (CD45.2<sup>+</sup>) and C57BL/6 CD45.1 mice (CD45.1<sup>+</sup>) cells, and analysed as described above. (F) Quantification of CD45.1<sup>+</sup> thymocytes or CD45.2<sup>+</sup> thymocytes as described above in (E) (n=3). (G) Thymocyte distribution in mice reconstituted by mixed bone marrow (WT (CD45.2<sup>+</sup>) and C57BL/6 CD45.1 (CD45.1<sup>+</sup>)). Thymocyte subgroups were distinguished by surface mark, and then the ratio of CD45.1<sup>+</sup> and CD45.2<sup>+</sup> cells were compared in each group. (H) Thymocyte distribution in mice reconstituted by mixed bone marrow (Sin1KO (CD45.2<sup>+</sup>) and C57BL/6 CD45.1 (CD45.1<sup>+</sup>)). CD45.1<sup>+</sup> and CD45.2<sup>+</sup> cells were compared in each group as (G) Error bars shows mean  $\pm$  SD. Significance was determined by two-tailed Student's *t* test (\*,  $p < 0.05$ ; ns, no significant difference).

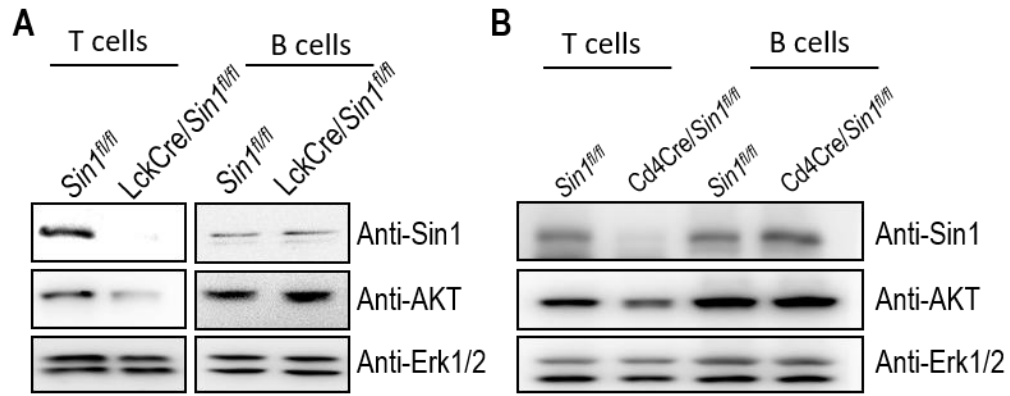

**Supplementary Figure S4. Deletion Sin1 in T cells from *LckCre/Sin1<sup>fl/fl</sup>* and *Cd4Cre/Sin1<sup>fl/fl</sup>* mice.**

(A) Immune blot assay of Sin1 expression in T cells and B cells isolated from splenocytes of *Sin1<sup>fl/fl</sup>* and *LckCre/Sin1<sup>fl/fl</sup>* mice. AKT and Erk1/2 expression were served as loading controls. (B) Immune blot assay of Sin1 expression in T cells and B cells isolated from splenocytes of *Sin1<sup>fl/fl</sup>* and *Cd4Cre/Sin1<sup>fl/fl</sup>* mice. AKT and Erk1/2 were served as controls.



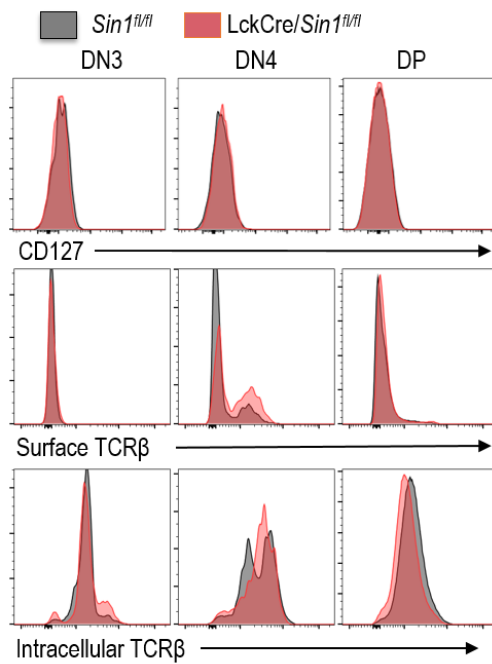

**Supplementary Figure S5. *Sin1* deficiency does not affect CD127 and TCRβ expression in thymocytes**

CD127 and TCRβ expression from freshly isolated thymocytes were determined by FACS staining with a panel of antibodies against CD4, CD8, CD25, CD44, CD127, and TCRβ. Histograms show the surface expression of CD127 and TCRβ, or the intracellular expression of TCRβ gated from CD4<sup>-</sup>CD8<sup>-</sup> double negative (DN) stage 3 and DN4, or CD4<sup>+</sup>CD8<sup>+</sup> double positive (DP) as indicated.

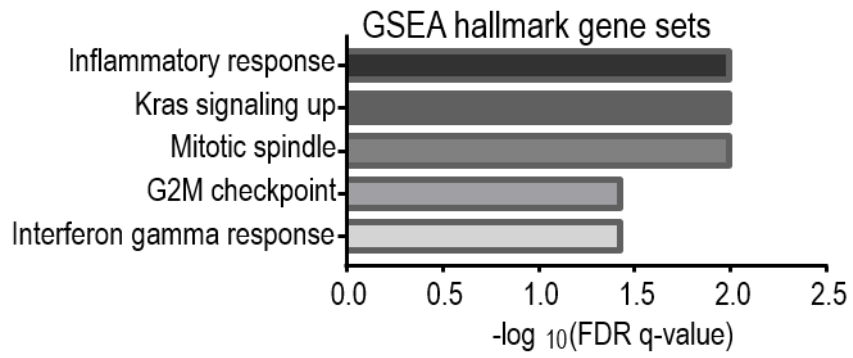

**Supplementary Figure S6. Gene sets upregulated in DN thymocytes of Sin1 deficient mice by GSEA analysis**

RNA was extracted from DN thymocytes that were sorted from the total thymocytes of the *Sin1<sup>fl/fl</sup>* and *LckCre/Sin1<sup>fl/fl</sup>* mice and sequenced on an Illumina Nextseq 500 in a 75 bp paired-end configuration.

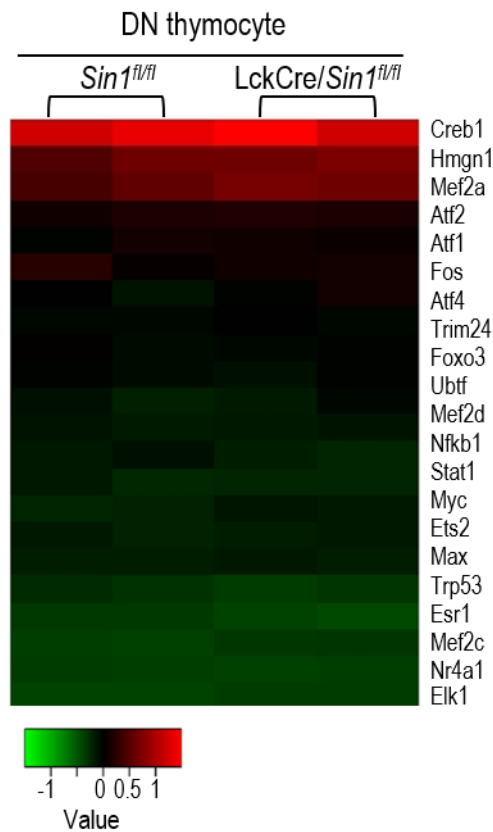

**Supplementary Figure S7. *Sin1* deficiency does not alter the downstream of MAPK signal pathways**

RNA-Seq analysis of gene expression in CD4<sup>-</sup>CD8<sup>-</sup> double negative (DN) stage thymocytes. RNA was extracted from purified DN thymocytes of *Sin1<sup>fl/fl</sup>* or *LckCre/Sin1<sup>fl/fl</sup>* mice as indicated, and sequenced on an Illumina Nextseq 500 machine in a 75 bp paired-end configuration. Downstream of MAPK signal were selected and analyzed by R package DESeq2.

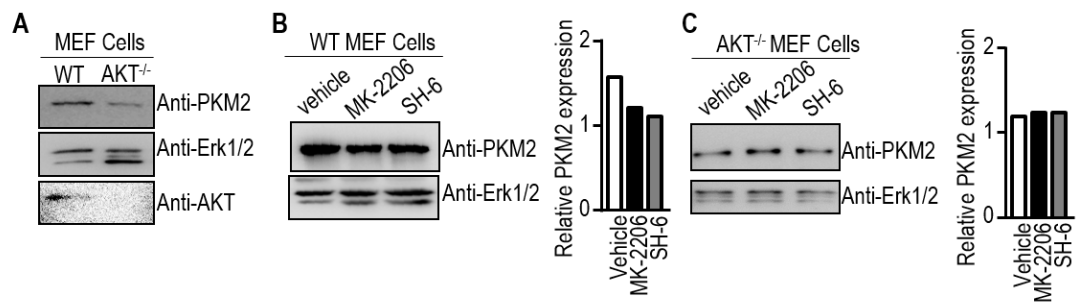

**Supplementary Figure S8. AKT controls PKM2 expression in MEF cells.**

(A) Immune blot assay for PKM2 expression in WT and AKT1/2<sup>-/-</sup> MEF cells (AKT<sup>-/-</sup>). Whole cell extracts were prepared for immunoblotting for PKM2 expression, and Erk1/2 is served as a loading control. (B) Immune blot assay for PKM2 expression in WT MEF cells treated with vehicle or 10  $\mu$ M of MK-2206 or SH-6 overnight. Whole cell extracts were prepared for immunoblotting for PKM2 expression, and Erk1/2 is served as a loading control. The right bar shows the relative PKM2 expression normalized to Erk1/2 level. (C) Immune blot assay for PKM2 expression in AKT1/2<sup>-/-</sup> MEF cells (AKT<sup>-/-</sup>) treated with vehicle or 10  $\mu$ M of MK-2206 or SH-6 overnight. Whole cell extracts were prepared for immunoblotting for PKM2 expression, and Erk1/2 is served as a loading control. The right bar shows the relative PKM2 expression normalized to Erk1/2 level.

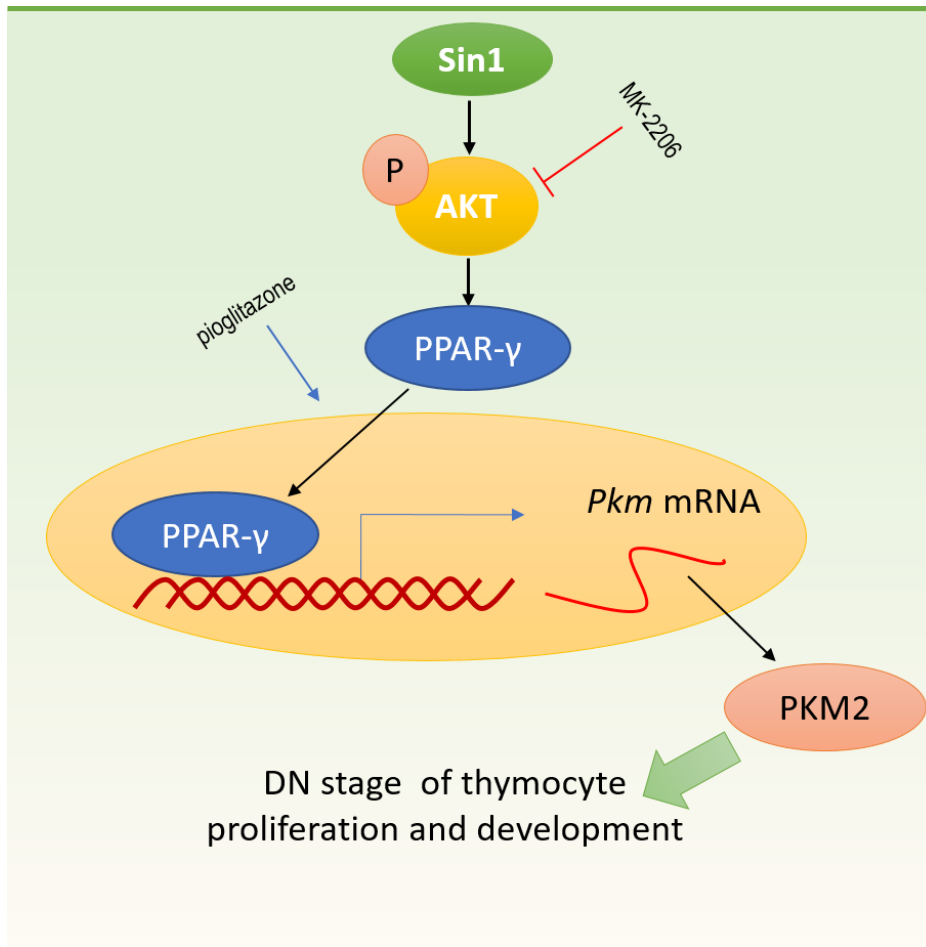

**Supplementary Figure S9. proposed model illustrating the Sin1-mediated regulation of early thymocyte proliferation and development**

Sin1 first mediates AKT phosphorylation at Thr450 and Ser473, which activates it to phosphorylate PPAR- $\gamma$ , leading to PPAR- $\gamma$  nuclear translocation to upregulate PKM2 expression. Augmented PKM2 expression is critical for thymocyte glycolysis and CD4/CD8 double negative thymocyte proliferation and development.

## II. Supplementary tables

### Supplementary Table S1. Primers used for genotyping.

| Primers | Sequence                      |
|---------|-------------------------------|
| P1      | 5'-TGTATTAGCCTGCACAAGGAG T-3' |
| P2      | 5'-CAACGGGTTCTTCTGTAGTCC-3'   |
| P3      | 5'-ATGGACTGCTTGCCTGAACT-3'    |
| P4      | 5'-ATTGAACTGATGGCGAGCTC-3'    |

### Supplementary Table S2. Primers used for Real time-PCR

| Primers  | Sequence                     |
|----------|------------------------------|
| pkm2 for | 5'-TCGCATGCAGCACCTGATT-3'    |
| pkm2 rev | 5'-CCTCGAATAGCTGCAAGTGGTA-3' |
| PKM1 for | 5'-GCTGTTTGAAGAGCTTGTGC-3'   |
| PKM1 rev | 5'-TTATAAGAGGCCTCCACGCT-3'   |

### Supplementary Table S3. Transcriptions significantly more abundant in Sin1 deficient DN thymocytes

| Gene          | FC       | P-value  | Gene          | FC       | P-value  |
|---------------|----------|----------|---------------|----------|----------|
| AA465934      | 1.55314  | 0.001417 | Gm14085       | 1.608389 | 0.013904 |
| Il5ra         | 1.363755 | 0.002093 | 9230116N13Rik | 1.370019 | 0.01408  |
| 2610020C07Rik | 1.303183 | 0.003306 | Gm20939       | 1.32094  | 0.015825 |
| C030037D09Rik | 1.820512 | 0.004424 | Papss2        | 1.304995 | 0.016756 |
| Slc6a19       | 1.518907 | 0.005496 | Akr1c12       | 1.450124 | 0.018073 |
| Mnd1-ps       | 1.440158 | 0.005885 | 1110019D14Rik | 1.321578 | 0.018112 |
| Pou4f1        | 1.318267 | 0.006857 | Myof          | 1.308711 | 0.018177 |
| Plscr4        | 1.314385 | 0.007784 | Bambi-ps1     | 1.347448 | 0.020048 |
| Tlcd2         | 1.364191 | 0.008101 | Gm43549       | 1.56196  | 0.020489 |
| Gm5511        | 1.379382 | 0.008436 | Necab1        | 1.524796 | 0.020882 |
| Shc4          | 1.320668 | 0.009011 | 2310009B15Rik | 1.302137 | 0.021366 |
| 5830405F06Rik | 1.355672 | 0.009949 | Iigp1         | 1.533071 | 0.024651 |
| Arl6          | 1.31049  | 0.00995  | 1700097N02Rik | 1.373809 | 0.02518  |
| Gm6245        | 1.360426 | 0.010015 | Gm13577       | 1.314502 | 0.030514 |
| Neb           | 1.339836 | 0.011115 | Prtg          | 1.317325 | 0.033327 |
| Xaf1          | 1.489296 | 0.01191  | 9630013D21Rik | 1.413191 | 0.037501 |
| Adam11        | 1.620735 | 0.01217  | 6820402A03Rik | 1.393233 | 0.03925  |
| A430035B10Rik | 1.304762 | 0.012603 | Fgfbp3        | 1.322822 | 0.04149  |
| Gm13051       | 1.402711 | 0.013674 | Gm2885        | 1.485788 | 0.044029 |
| Mnd1          | 1.33225  | 0.013881 | Gm12185       | 1.434093 | 0.049829 |

FC, fold change. P-value is determined by negative test.

**Supplementary Table S4. Transcriptions significantly less abundant in Sin1 deficient DN thymocytes**

| Gene     | FC       | P-value  | Gene          | FC       | P-value  |
|----------|----------|----------|---------------|----------|----------|
| S100a9   | 0.161502 | 0.001533 | Gm8399        | 0.642312 | 0.005129 |
| Ngp      | 0.169441 | 0.002351 | Gm14176       | 0.64235  | 0.007019 |
| Chil3    | 0.226392 | 0.000139 | Slc25a22      | 0.642639 | 0.010493 |
| S100a8   | 0.232356 | 0.000205 | Gm7901        | 0.646091 | 0.004392 |
| Bckdha   | 0.362002 | 0.008423 | Tigar         | 0.646311 | 0.009352 |
| Cd74     | 0.378199 | 0.001413 | Chst3         | 0.646559 | 0.008718 |
| Cd7      | 0.379179 | 0.006605 | Ighd          | 0.646751 | 0.007029 |
| Fcmmr    | 0.391279 | 0.005821 | Gm6472        | 0.647048 | 0.005777 |
| Lyz2     | 0.403436 | 0.000317 | Arrb1         | 0.647771 | 0.006609 |
| Ctsw     | 0.414476 | 0.00752  | Tln1          | 0.647883 | 0.004582 |
| Igll3    | 0.430159 | 0.0065   | Sgta          | 0.648246 | 0.009471 |
| Gm15564  | 0.448766 | 0.00389  | Dennd5b       | 0.648501 | 0.007614 |
| Gm8730   | 0.450076 | 0.012437 | Rpl9-ps6      | 0.648858 | 0.008506 |
| Gzmb     | 0.451077 | 0.010581 | Slc38a10      | 0.649196 | 0.001817 |
| Rin3     | 0.466499 | 0.006815 | Rpl36a-ps3    | 0.64935  | 0.009398 |
| Cd19     | 0.470244 | 0.012427 | Gpsm3         | 0.649791 | 0.007871 |
| H2-Aa    | 0.474232 | 0.003865 | Amica1        | 0.650198 | 0.012462 |
| Hsf1     | 0.476609 | 0.007287 | Slc25a45      | 0.651636 | 0.011236 |
| Dock2    | 0.482097 | 0.005092 | Shisa5        | 0.652149 | 0.005779 |
| Il2rb    | 0.483449 | 0.007746 | Rps19-ps6     | 0.653607 | 0.009071 |
| Itgb7    | 0.48775  | 0.008112 | Rbck1         | 0.655172 | 0.003789 |
| Rpl8     | 0.488199 | 0.009002 | Rps5          | 0.655461 | 0.000185 |
| Pdk2     | 0.489229 | 0.004695 | Ucp2          | 0.656961 | 0.010161 |
| Oaz1-ps  | 0.498731 | 0.008059 | Tecr          | 0.657162 | 0.01423  |
| Gm42418  | 0.503181 | 0.010602 | Gm1840        | 0.657203 | 0.0101   |
| H2-Ab1   | 0.513372 | 0.003371 | Plekho2       | 0.65777  | 0.010597 |
| Slc25a10 | 0.51487  | 0.010811 | B4galt5       | 0.660613 | 0.004866 |
| Capg     | 0.515422 | 0.009359 | Bank1         | 0.661061 | 0.013856 |
| Myo1f    | 0.518331 | 0.01394  | Map7d1        | 0.661613 | 0.009292 |
| Nbeal2   | 0.522226 | 0.003942 | Pfdn5         | 0.661923 | 0.005227 |
| Eno1     | 0.524555 | 0.014605 | Syvn1         | 0.662761 | 0.006164 |
| Cybb     | 0.529451 | 0.010933 | Pkib          | 0.6631   | 0.008575 |
| Card11   | 0.529874 | 0.007035 | Cyth4         | 0.664992 | 0.006469 |
| Lilrb4a  | 0.531902 | 0.00187  | Hvcn1         | 0.665405 | 0.01341  |
| B4galnt1 | 0.532433 | 0.005082 | Cyc1          | 0.665999 | 0.006515 |
| Gm4737   | 0.538116 | 0.007638 | Gm15427       | 0.667235 | 0.008337 |
| Epn1     | 0.544527 | 0.004539 | 2310067B10Rik | 0.668588 | 0.008127 |
| Blnk     | 0.548162 | 0.001092 | Pfn1          | 0.669565 | 0.001157 |
| Cd72     | 0.54884  | 0.000553 | Parvg         | 0.670119 | 0.009968 |

| Gene     | FC       | P-value  | Gene      | FC       | P-value  |
|----------|----------|----------|-----------|----------|----------|
| Ncf1     | 0.552351 | 0.012562 | Fmn11     | 0.670425 | 0.00264  |
| Anxa1    | 0.552807 | 0.011799 | Pnpla2    | 0.670804 | 0.004846 |
| Gm6560   | 0.55563  | 0.011439 | Scd1      | 0.671904 | 0.005082 |
| Cd180    | 0.55735  | 0.002378 | Map4k1    | 0.672962 | 0.007757 |
| Pax5     | 0.55832  | 0.005576 | Tpi1      | 0.673148 | 0.000648 |
| Lars2    | 0.559982 | 0.00734  | Atad3a    | 0.673453 | 0.011443 |
| Cr2      | 0.561151 | 0.001993 | Gpsm1     | 0.676724 | 0.004376 |
| Pold2    | 0.561959 | 0.003203 | Eef1a1    | 0.677608 | 0.004754 |
| Cd83     | 0.562    | 0.010713 | Tmc8      | 0.677807 | 0.001455 |
| Cd52     | 0.562269 | 0.013828 | Pkm       | 0.678618 | 0.012051 |
| F2r      | 0.562324 | 0.008896 | Pde1b     | 0.679204 | 0.000238 |
| Peg13    | 0.562871 | 0.013196 | Lcp1      | 0.680271 | 0.000997 |
| Abca2    | 0.563707 | 0.003454 | Actb      | 0.680423 | 0.003308 |
| Sh3bgrl3 | 0.563956 | 0.006736 | Mapk3     | 0.68125  | 4.14E-05 |
| Pstpip1  | 0.567305 | 0.00427  | Creb3     | 0.682085 | 0.010651 |
| Lsp1     | 0.568381 | 0.005286 | Gm5526    | 0.682618 | 0.010091 |
| Plcg2    | 0.58714  | 0.008432 | Rpl3-ps1  | 0.682984 | 0.007465 |
| Actg1    | 0.588768 | 0.008388 | Ftl1      | 0.684414 | 0.00855  |
| Zfp551   | 0.59207  | 0.001268 | Traf7     | 0.685609 | 0.006467 |
| Rasgrp3  | 0.593172 | 0.012222 | Ehmt2     | 0.686055 | 0.00284  |
| Atp5l    | 0.5947   | 0.000679 | Coro1a    | 0.686408 | 0.004692 |
| Ptpn6    | 0.59615  | 0.003034 | 43352     | 0.686797 | 0.010607 |
| Atp13a2  | 0.596203 | 0.008671 | Mybbp1a   | 0.68689  | 0.001123 |
| Guk1     | 0.598342 | 0.010388 | Hmgxb3    | 0.688444 | 0.008484 |
| Fermt3   | 0.59864  | 0.011264 | St6gal1   | 0.688531 | 0.010072 |
| Aldoa    | 0.599694 | 0.001065 | Tkt       | 0.689794 | 0.002042 |
| Myo1g    | 0.600162 | 0.004535 | Rps11-ps1 | 0.690878 | 0.001655 |
| Eif3k    | 0.600426 | 0.011289 | Gm5428    | 0.690895 | 0.005982 |
| Dgkz     | 0.600679 | 0.002683 | Gnl1      | 0.691202 | 0.005992 |
| Eef2     | 0.602145 | 0.000706 | Anxa6     | 0.691265 | 0.006899 |
| Pfkl     | 0.603828 | 0.010109 | Ubr4      | 0.691413 | 0.003168 |
| Flna     | 0.604609 | 0.008229 | Gm7536    | 0.692604 | 0.005645 |
| Unc13d   | 0.605433 | 0.007234 | Cluh      | 0.692859 | 0.005581 |
| Zyx      | 0.606438 | 0.010563 | Acadv1    | 0.695137 | 0.011243 |
| Arhgef1  | 0.608366 | 0.008638 | Helz2     | 0.695361 | 0.000119 |
| Unc45a   | 0.612875 | 0.000277 | Gm10288   | 0.695496 | 0.003554 |
| H3f3c    | 0.61775  | 0.011055 | Gnb211    | 0.696193 | 0.004499 |



| Gene     | FC       | P-value  | Gene     | FC       | P-value  |
|----------|----------|----------|----------|----------|----------|
| Gm15772  | 0.620428 | 0.00247  | Rpl41    | 0.696705 | 0.010824 |
| Sorl1    | 0.623466 | 0.011337 | Ech1     | 0.696769 | 0.004377 |
| Kri1     | 0.623579 | 0.000847 | Zgpat    | 0.697692 | 0.002003 |
| Tmem222  | 0.624288 | 0.003672 | Gm4366   | 0.698247 | 0.00607  |
| Srm      | 0.625456 | 0.006284 | Cuedc2   | 0.70106  | 0.007913 |
| Sipa1    | 0.628109 | 0.006332 | Aurkaip1 | 0.701097 | 0.011578 |
| Lgals1   | 0.631843 | 0.011414 | Armc7    | 0.701478 | 0.012745 |
| Gm13456  | 0.633046 | 0.006196 | Smarca4  | 0.701896 | 0.010451 |
| Fcrla    | 0.633765 | 0.007981 | Itgal    | 0.702346 | 0.00812  |
| Lrrk2    | 0.633827 | 0.012972 | Cst3     | 0.702962 | 0.000985 |
| Mast3    | 0.635784 | 0.008608 | Uqcrh    | 0.703023 | 0.000225 |
| Cdc37    | 0.637349 | 0.000258 | Mapkap1  | 0.707385 | 0.017093 |
| Akap8l   | 0.639241 | 0.013949 | Gpi1     | 0.709376 | 6.55E-15 |
| Gm7665   | 0.639634 | 0.012652 | Gpx4     | 0.710535 | 0.001771 |
| Sbf1     | 0.640244 | 0.013882 | Idh3g    | 0.729158 | 0.001546 |
| Trappc9  | 0.640567 | 0.002821 | Uqcrc1   | 0.763413 | 0.009118 |
| Gm1821   | 0.64079  | 0.003399 | Ndufs6   | 0.77162  | 0.008609 |
| Lrp5     | 0.642178 | 0.007606 | Mdh2     | 0.798854 | 0.004548 |
| Rpl9-ps7 | 0.642228 | 0.00229  | Ndufv3   | 0.840939 | 0.014215 |

FC, fold change. P-value is determined by negative test.
